# Supplementary material for: YTHDC1 regulates distinct post-integration steps of HIV-1 replication and is important for viral infectivity
Source: PubMed Central journal article supplement (PMC8805373; doi:10.1186/s12977-022-00589-1), 2022-01-31

Figure S1

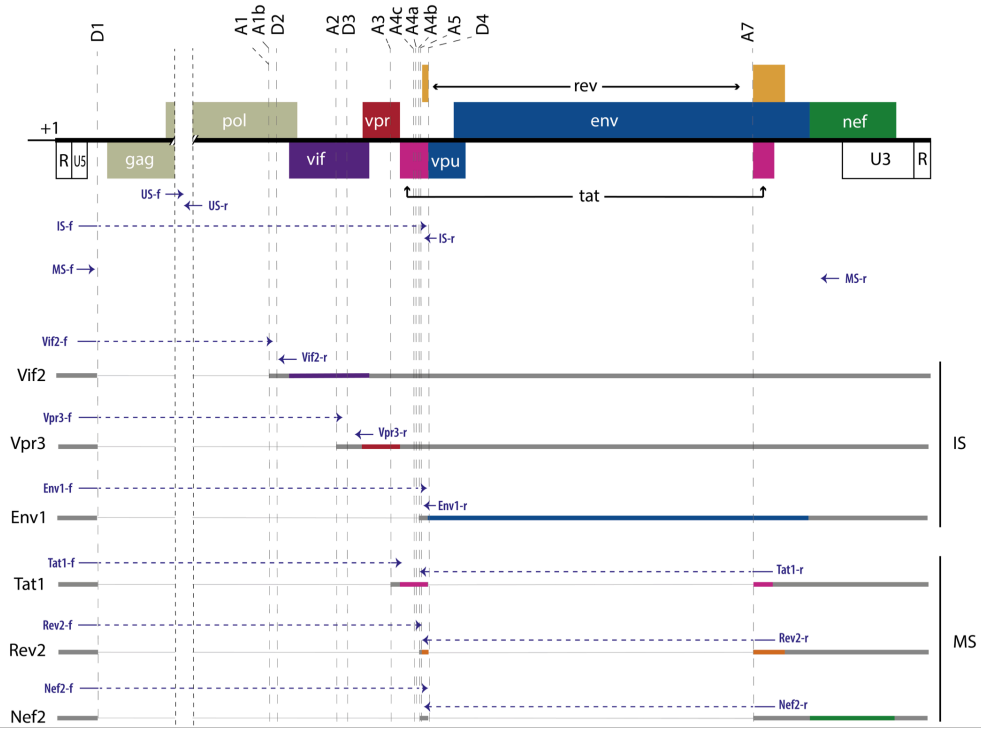

Figure S2

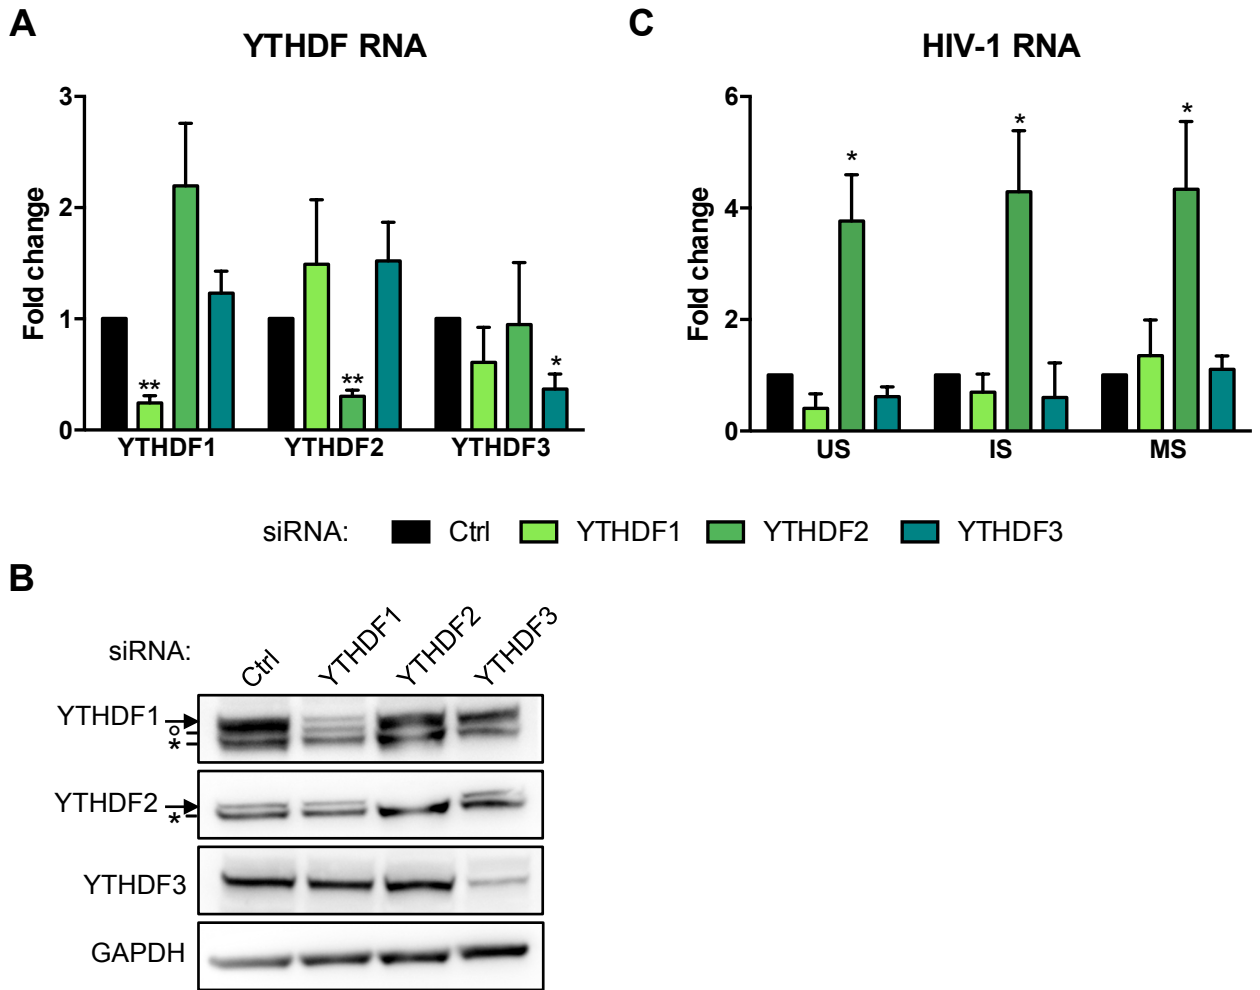

Figure S3

A

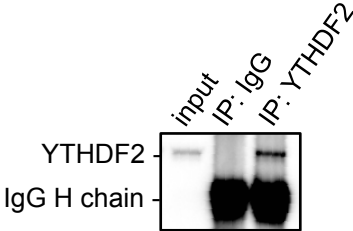

B

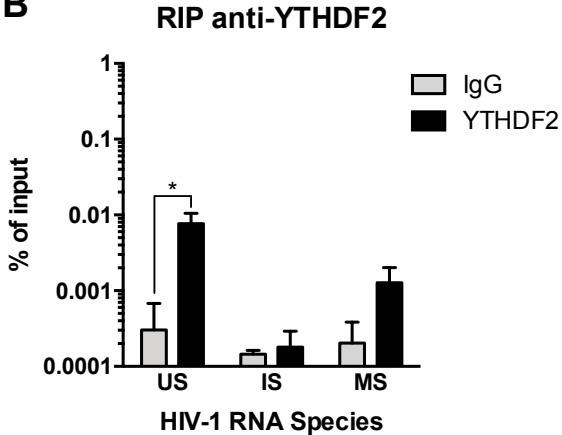

Figure S4

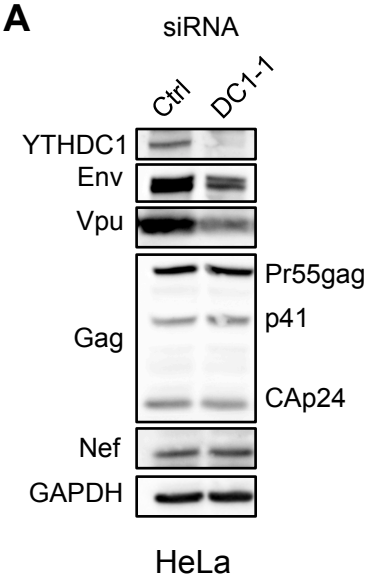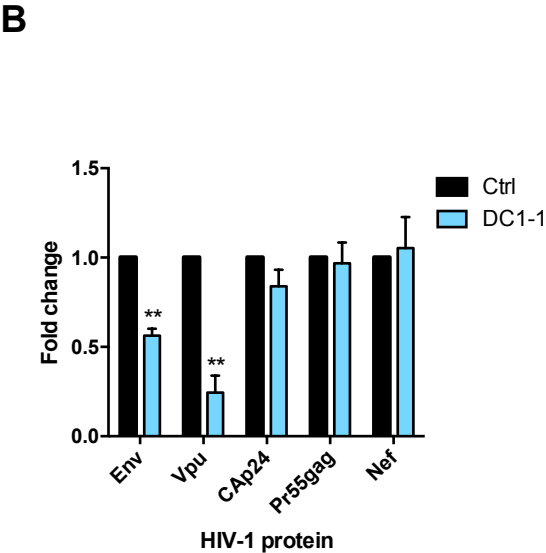

Supplement: 12977_2022_589_MOESM1_ESM.pdf [file 12977_2022_589_MOESM1_ESM.pdf]
